# Vitamin D<sub>3</sub>-dependent VDR signaling delays ron-mediated breast tumorigenesis through suppression of $\beta$ -catenin activity

Abby L. Johnson<sup>1,2</sup>, Glendon M. Zinser<sup>1,2</sup> and Susan E. Waltz<sup>2,3</sup>

<sup>1</sup> Department of Environmental Health, University of Cincinnati, Cincinnati, Ohio, USA

<sup>2</sup> Department of Cancer Biology, University of Cincinnati College of Medicine, Cincinnati, Ohio, USA

<sup>3</sup> Department of Research Service, Cincinnati Veterans Affairs Medical Center, Cincinnati, Ohio, USA

**Correspondence to:** Susan E. Waltz, **email:** susan.waltz@uc.edu

**Keywords:** vitamin D<sub>3</sub> receptor, ron,  $\beta$ -catenin, breast cancer

**Received:** January 28, 2015

**Accepted:** April 22, 2015

**Published:** May 10, 2015

This is an open-access article distributed under the terms of the Creative Commons Attribution License, which permits unrestricted use, distribution, and reproduction in any medium, provided the original author and source are credited.

## ABSTRACT

**The Ron receptor is upregulated in human breast cancers and correlates with enhanced metastasis and reduced patient survival. Ron overexpression drives mammary tumorigenesis through direct  $\beta$ -catenin activation and augmented tumor cell proliferation, migration and invasion. Ron and  $\beta$ -catenin are also coordinately elevated in breast cancers. The vitamin D receptor (VDR) antagonizes  $\beta$ -catenin signaling. Herein, we examined mammary tumor onset and progression using a Ron-driven murine model of breast tumorigenesis crossed with VDR deficient mice. VDR ablation accelerated mammary tumor onset and led to tumors that exhibited a desmoplastic phenotype and enhanced metastases. Tumor levels of active  $\beta$ -catenin were markedly increased in the absence of VDR. *In vitro*, VDR activation in breast cancer cells reduced  $\beta$ -catenin activation and transcriptional activity leading to elevated expression of the extracellular Wnt inhibitor dickkopf-related protein 1, and a reduction in the interaction of  $\beta$ -catenin with the cyclin D1 promoter. Expression of a stabilized form of  $\beta$ -catenin ablated the protective effects of VDR activation. Collectively, these studies delineate a protective role for VDR signaling in Ron-induced mammary tumorigenesis through disruption of  $\beta$ -catenin activation.**

## INTRODUCTION

The Ron receptor tyrosine kinase, also known as macrophage-stimulating 1 receptor (MST1R), is overexpressed in approximately 50% of human breast cancers [1] and is associated with increased metastasis and poor patient prognosis [2]. Similarly, overexpression of hepatocyte growth factor-like protein (HGFL), the only known Ron ligand, and matriptase, an enzyme involved in the cleavage of pro-HGFL to produce the active ligand, are also negative prognostic factors in breast cancer [3]. Ron expression is primarily localized to epithelial cells and resident macrophages (reviewed in [4]). In normal mammary epithelial cells, Ron expression is very low but becomes overexpressed in breast cancer cells [1]. In Ron expressing human breast cancer cell lines, T47D and ZR-75-1, activation of the Ron receptor increases cell proliferation, migration and invasion [1, 5].

Oncogenic Ron activation is associated with the activation of a variety of signal transduction pathways including activation of PI3-K/Akt [6, 7], MAPK [8], Ras [9, 10], Src, and  $\beta$ -catenin [11, 12]. In a model of breast cancer with targeted overexpression of Ron in the mammary epithelium,  $\beta$ -catenin was shown to be required for Ron-mediated mammary tumorigenesis [13, 14]. The  $\beta$ -catenin signaling axis has been shown to be upregulated in many human breast cancers and is associated with poor disease prognosis [15-20]. Activation of  $\beta$ -catenin can occur directly through Ron-induced phosphorylation of residues Tyr 654 and Try 670 resulting in  $\beta$ -catenin nuclear translocation and enhanced transcription of cyclin D1 and c-Myc target genes [14]. Moreover, genetic ablation of  $\beta$ -catenin reduced Ron-directed mammary tumor growth and metastasis, as well as cell proliferation *in vitro* [14], which was further confirmed in a study utilizing a transgenic mouse model with Ron overexpression in the

mammary epithelium and targeted deletion of  $\beta$ -catenin [21]. Thus, understanding how perturbations in the Ron- $\beta$ -catenin signaling axis affect the therapeutic response of breast cancers with a highly metastatic phenotype is critical for lessening the deaths associated with metastatic disease.

The vitamin D receptor (VDR) is a nuclear hormone receptor that protects against mammary tumor formation, progression and metastasis in the presence of  $1,25D_3$  through induction of cell-cycle arrest, promotion of apoptosis, regulation of differentiation, and reduction in angiogenesis (reviewed in [22-25]). Ligand-dependent VDR signaling has been shown to antagonize the  $\beta$ -catenin signaling pathway through several mechanisms in human and murine colon cancer cells (reviewed in [26]). For example, induced VDR activation promotes transcriptional upregulation of E-cadherin which inhibits  $\beta$ -catenin nuclear localization and induces translocation to adherens junctions at the plasma membrane [27-29]. Ligand-dependent VDR signaling also increases mRNA expression of Dickkopf-related protein 1 (DKK-1), an inhibitor of the canonical Wnt signaling pathway, that subsequently prevents the activation of  $\beta$ -catenin by way of Wnt signaling [30]. TCF-4 is transcriptionally regulated by VDR in murine colon and breast cancer cells for growth inhibition [31]. In colon cancer, ligand-bound VDR also competes with transcription factors for  $\beta$ -catenin binding between the activator function-2 (AF-2) domain of VDR and the C terminus of  $\beta$ -catenin [32] thus physically preventing transcriptional activation of TCF/LEF target genes [27]. Given the negative regulation of  $\beta$ -catenin signaling by VDR activation, we hypothesized that vitamin  $D_3$ -dependent VDR signaling would impede the aggressive progression of Ron-mediated breast tumorigenesis.

Herein we demonstrate that VDR limits Ron-induced mammary tumor initiation and growth by decreasing active  $\beta$ -catenin levels and through a reduction in  $\beta$ -catenin target genes. Further, vitamin  $D_3$  treatment reduced breast cancer cell growth, migration, and invasion in Ron expressing breast cancer cells. Moreover, Ron knockdown (KD) further sensitized breast cancer cells to the growth inhibitory effects of vitamin  $D_3$ , while constitutive activation of  $\beta$ -catenin reverted the effects of vitamin  $D_3$ . Mechanistically,  $1,25D_3$  reduced active  $\beta$ -catenin levels, decreased  $\beta$ -catenin transcriptional activity, increased expression of DKK-1, and diminished the association of active  $\beta$ -catenin with the cyclin D1 promoter. Thus, combinational therapies integrating Ron or receptor tyrosine kinase (RTK) antagonists with vitamin  $D_3$  or potent vitamin  $D_3$  analogs in breast cancers exhibiting Ron overexpression may provide a beneficial alternative to current standard of care chemotherapeutic agents.

## RESULTS

### Loss of VDR signaling accelerates epithelial hyperplasia in the mammary glands of MMTV-Ron mice

To examine the role of vitamin D receptor (VDR) signaling in the development of Ron-mediated breast tumorigenesis, MMTV-Ron transgenic mice were crossed to mice deficient for VDR (VDR<sup>-/-</sup>) generating offspring with VDR haploinsufficiency. Littermates were intercrossed to generate VDR<sup>+/+</sup>, VDR<sup>-/-</sup> mice or mice heterozygous for a functional VDR with Ron overexpression specific to the mammary epithelium. Analysis of protein and mRNA from transgenic mouse mammary gland lysates shows Ron and VDR expression levels in the MMTV-Ron VDR<sup>-/-</sup> model (Figures 1A and 1B).

Previous studies demonstrated that tissues with targeted overexpression of Ron in the mammary epithelium develop hyperplasia by 12 weeks of age [13]. Mammary gland hyperplasia was evident in the majority of MMTV-Ron VDR<sup>-/-</sup> mice at 10 weeks (Figures 1C and 1D). Contrastingly, most age-matched glands from MMTV-Ron VDR<sup>+/+</sup> mice exhibited a normal phenotype at this early time point suggesting that VDR delays Ron-mediated mammary hyperplasia. However, by 4 months of age almost all MMTV-Ron VDR<sup>+/+</sup> and VDR<sup>-/-</sup> mice exhibited severely dilated, cystic acini similar to the mammary epithelium previously reported in MMTV-Ron induced tumorigenesis [13].

### VDR signaling delays mammary tumor onset and reduces metastasis to the lungs and liver

Mammary tumor formation occurred in all study mice regardless of VDR status. However, MMTV-Ron mice homozygous or heterozygous for VDR exhibited significantly longer times to palpable tumor formation compared to VDR<sup>-/-</sup> mice (Figure 2A and inset). The mean time-to-tumor onset was 178.5 days for VDR<sup>-/-</sup> mice compared to 227 days for VDR<sup>+/-</sup> and 241 days for VDR<sup>+/+</sup> mice in the MMTV-Ron background. Morphological assessment of mammary tissue from eight month-old transgenic mice displayed extremely dilated ducts in the absence of VDR with large foci of keratin pearls containing concentric circles of abnormal squamous cells with a high deposition of cytokeratins (Figure 2B, upper panels) and MMTV-Ron VDR<sup>-/-</sup> tumors demonstrated a desmoplastic phenotype, densely abundant in connective tissue (Figure 2B, lower panels).

VDR signaling has been shown to inhibit the metastatic potential of human and mouse breast cancer cells [33]. Tumor progression was similarly monitored in

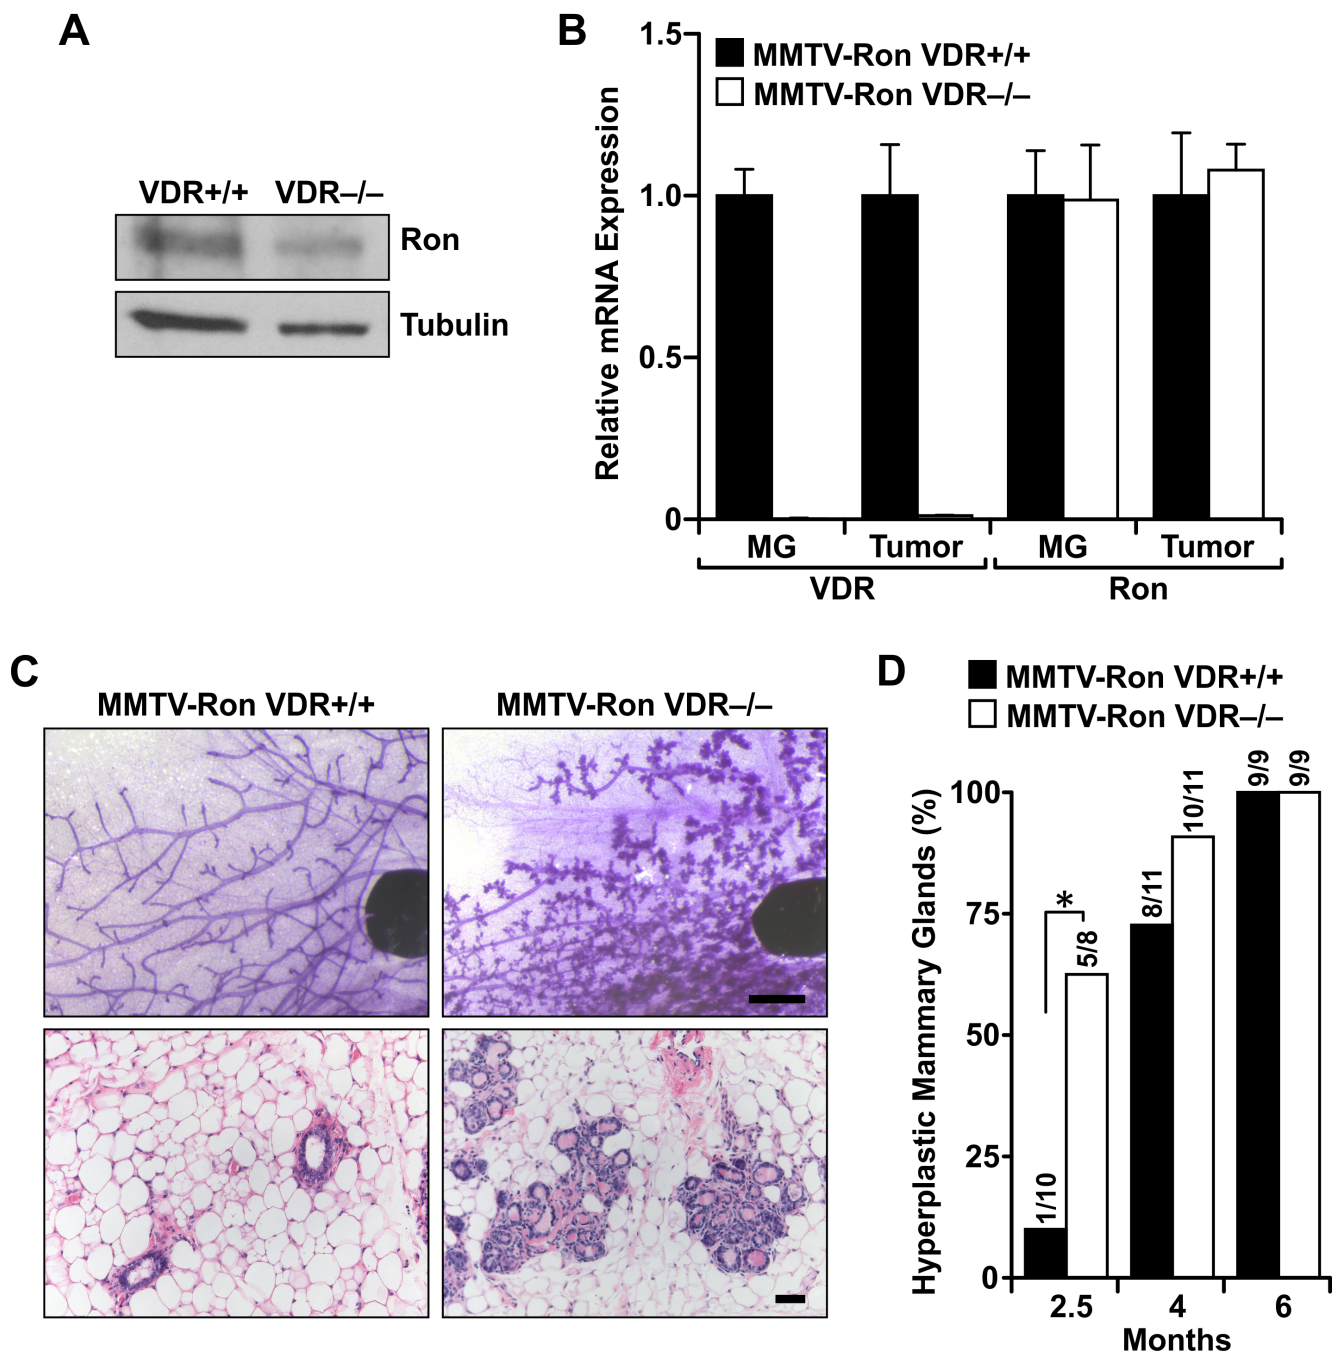

**Figure 1: VDR signaling delays Ron-mediated mammary gland hyperplasia.** A. Western blot of mammary lysates from MMTV-Ron VDR<sup>+/+</sup> and VDR<sup>-/-</sup> mice depicting Ron expression levels. B. qRT-PCR analysis of Ron and VDR mRNA expression in mammary glands (MG) and tumors from MMTV-Ron VDR<sup>+/+</sup> and VDR<sup>-/-</sup> mice. Data represent mean values from three independent experiments  $\pm$  SE. C. Representative mammary whole mounts (upper panels) and H&E-stained tissue sections (lower panels) from 10 week-old MMTV-Ron VDR<sup>+/+</sup> and VDR<sup>-/-</sup> mammary glands ( $n = 8-11$ ). D. Incidence of mice with hyperplastic mammary glands at 2.5, 4 and 6 months of age from MMTV-Ron VDR<sup>+/+</sup> and VDR<sup>-/-</sup> animals. \* $P < 0.05$

MMTV-Ron VDR<sup>+/+</sup> and MMTV-Ron VDR<sup>-/-</sup> mice with nearly 90% of all study animals exhibiting lung and liver metastases. While VDR expression only modestly delayed the onset of lung and liver metastases (data not shown), the number of metastases per mouse tissue was consistently greater in MMTV-Ron VDR<sup>-/-</sup> mice compared to controls as seen by the representative immunohistochemical staining for Ron in the lungs (Figure 2C upper panels) and liver (Figure 2C lower panels). When quantified, the number of metastases per tissue was significantly increased with VDR ablation (Figure 2D).

### Ron-induced $\beta$ -catenin signaling is reduced in the presence of a functional VDR

$\beta$ -catenin is a well-established downstream target of Ron signaling, and upregulation of both pathways correlates with aggressive breast tumorigenesis and a high metastatic potential. Therefore, we analyzed the local expression of  $\beta$ -catenin within mammary tumors of the MMTV-Ron VDR<sup>+/+</sup> and VDR<sup>-/-</sup> mice (Figure 3A). Expression of  $\beta$ -catenin within the VDR<sup>-/-</sup> mammary epithelium was abundant and ubiquitous as demonstrated by both dark cytoplasmic and nuclear staining compared to tissues with a functional VDR that had more selective and localized  $\beta$ -catenin expression in the cytoplasm. qRT-

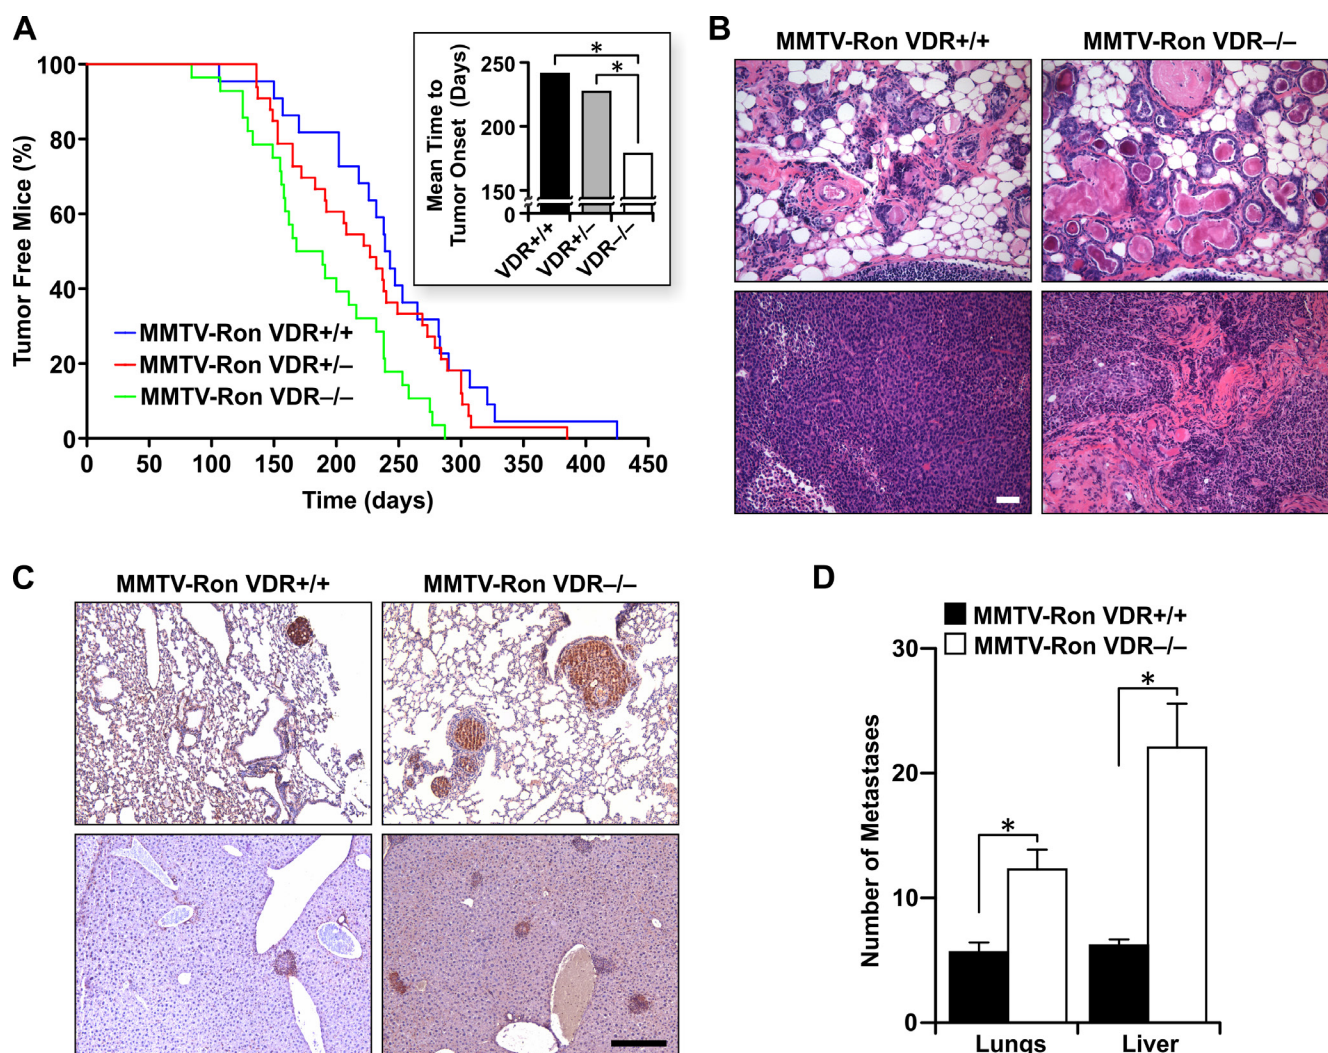

**Figure 2: VDR signaling delays mammary tumor formation and alters disease progression in MMTV-Ron mice.** **A.** Mammary tumor kinetics from MMTV-Ron VDR<sup>+/+</sup>, VDR<sup>+/-</sup>, and VDR<sup>-/-</sup> mice. Between 22 and 33 female mice per genotype were examined temporally for palpable tumor formation. The percent tumor-free mice is plotted as a function of age and is statistically significant with complete VDR ablation compared to VDR haploinsufficiency and VDR wild type mice. Inset: The mean time-to-tumor onset was plotted for each genotype. **B.** Representative mammary glands (upper panels) and tumors (lower panels) from 8 month-old MMTV-Ron VDR<sup>+/+</sup> and VDR<sup>-/-</sup> mice showing enhanced ductal dilation and desmoplasia with VDR ablation ( $n = 9-11$  per genotype). **C.** Representative immunohistochemical staining for Ron in lung (upper panels) and liver (lower panels) sections from 10 month-old MMTV-Ron VDR<sup>+/+</sup> and VDR<sup>-/-</sup> mice showing more metastases with loss of VDR ( $n = 5-6$  per genotype). **D.** The average number of metastases per lung ( $n = 24-25$ ) and liver ( $n = 14-19$ ) per genotype as assessed by histological analysis is plotted. Data represent mean values  $\pm$  SE. \* $P < 0.05$

PCR analysis of mammary tumors demonstrated increased  $\beta$ -catenin transcriptional activity as judged by enhanced mRNA expression of  $\beta$ -catenin target genes (Cyclin D1, c-Myc, TCF-7, VEGF and MMP7) in the absence of VDR (Figure 3B). This was further verified by Western analysis

in the MMTV-Ron VDR<sup>-/-</sup> mammary tumors showing enhanced active  $\beta$ -catenin (ABC) expression, correlating with higher protein levels of c-Myc and Cyclin D1 (Figure 3C).

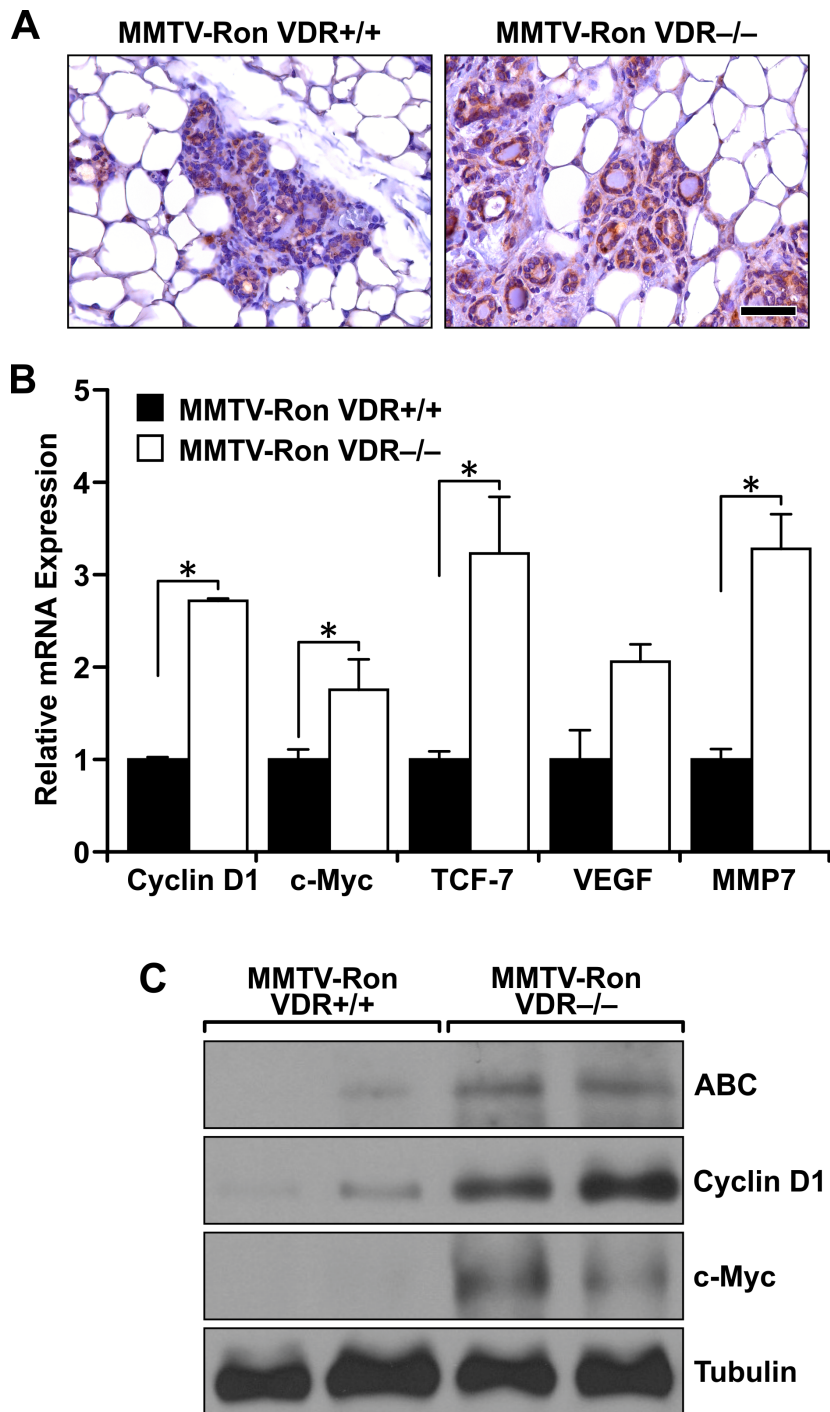

**Figure 3: Enhanced downstream  $\beta$ -catenin signaling in Ron-mediated mammary tumorigenesis with VDR ablation.**

**A.** Representative immunohistochemical staining for  $\beta$ -catenin in MMTV-Ron VDR<sup>+/+</sup> and VDR<sup>-/-</sup> mammary glands from 4 month-old mice demonstrating enhanced expression in the absence of VDR ( $n = 6$  per genotype). **B.** qRT-PCR mRNA expression of  $\beta$ -catenin target genes Cyclin D1, c-Myc, TCF-7, VEGF, and MMP7 in mammary tumors from 8 month-old MMTV-Ron VDR<sup>+/+</sup> and VDR<sup>-/-</sup> mice. Data represent mean values from three independent experiments  $\pm$  SE. **C.** Western analysis demonstrating enhanced expression of active  $\beta$ -catenin (ABC) levels in two representative MMTV-Ron VDR<sup>-/-</sup> tumor lysates compared to two MMTV-Ron VDR<sup>+/+</sup> tumors that correlates with increased expression of  $\beta$ -catenin target genes cyclin D1 and c-Myc. \* $P < 0.05$

## Ligand-dependent VDR-mediated inhibition of growth, migration and invasion is modulated by Ron receptor status

Murine tumor cells derived from MMTV-Ron mice (R7) mimic the Ron overexpression observed in human breast cancers and serve as an excellent model for studying Ron signaling in breast tumorigenesis [13]. In Figure 4A, we demonstrate that these cells express VDR and exhibit characteristic increases in VDR expression in response to  $1,25D_3$ -stimulation. To examine VDR functionality, we show that vitamin  $D_3$  treatment was able to reduce the rapid growth of R7 cells in a concentration-dependent manner, with nearly 50% reduction observed at 100 nM  $1,25D_3$  (Figure 4B).

As mammary tumors from MMTV-Ron mice undergo rapid growth and metastasis [13], we next measured the migratory capability of R7 cells in the presence of increasing concentrations of  $1,25D_3$ . Vitamin  $D_3$  in its active form dose-dependently delayed wound closure indicative of slower migration after 8 hours (Figure 4C). We next measured R7 cell invasiveness in the presence or absence of  $1,25D_3$ . At 100 nM  $1,25D_3$ , the percent of breast cancer cell invasion was significantly reduced (Figure 4D).

To examine these effects in human breast cancer cells, T47D cells, with and without a Ron knockdown (KD) were utilized [14]. Ron KD was confirmed by Western and qRT-PCR analyses (Figures 4E and 4F). Ron KD (shRon) in T47D cells correlated with decreased  $\beta$ -catenin mRNA expression (Figure 4F) and active  $\beta$ -catenin protein levels (data not shown), while VDR mRNA transcript levels were comparable between the non-transfected control (shNT) and shRon T47D cells.  $1,25D_3$  dose-dependently reduced T47D cell numbers with roughly a 25% reduction at a concentration of 100 nM (Figure 4G). However, diminution of Ron expression sensitized T47D cells to vitamin  $D_3$ -induced growth inhibition as shRon T47D cell number was further and significantly reduced an additional 16.7% and 25.4% at 10 nM and 100 nM  $1,25D_3$ , respectively compared to shNT controls (Figure 4G). To account for the effects of Ron loss on cell growth, cell number was normalized to 1 for each cell type independently in Figure 4G.

Similar to R7 cells,  $1,25D_3$  also delayed wound closure in T47D cells indicative of a reduced migratory ability in the presence of vitamin  $D_3$ . Compared to shNT cells, Ron KD significantly delayed the rate of cell migration suggesting the importance of Ron signaling in driving the enhanced migratory phenotype (data not shown). However, compared to the respective vehicle-treated control,  $1,25D_3$  significantly delayed wound closure further in shRon T47D cells after 24 hours compared to shNT controls, suggesting that the effect of vitamin  $D_3$  on tumor cell migration is influenced by Ron

receptor status (Figure 4H).

## Vitamin $D_3$ decreases $\beta$ -catenin transcriptional activity and growth promotion

To understand the mechanism of vitamin  $D_3$ -dependent reductions in growth, migration and invasion in cells with Ron overexpression, we first measured protein levels of active  $\beta$ -catenin in R7 cells treated with various concentrations of  $1,25D_3$  (Figure 5A). Vitamin  $D_3$  reduced active  $\beta$ -catenin levels without affecting total levels of  $\beta$ -catenin. As protein levels of active  $\beta$ -catenin decreased in response to  $1,25D_3$ , decreased mRNA levels of the well-established  $\beta$ -catenin target genes cyclin D1, TCF-7, and MMP-7 were also observed (Figure 5B). The inability of vitamin  $D_3$  or VDR to significantly regulate VEGF expression in R7 cells or MMTV-Ron tumors, respectively, suggests that VDR signaling may not play a role in mitigating angiogenesis in this tumor model, but future work is warranted to satisfy this claim. To verify that  $\beta$ -catenin transcriptional activity was reduced with increasing concentrations of  $1,25D_3$ , we performed a dual luciferase assay in R7 cells utilizing reporter plasmids containing multiple copies of the TCF binding sequence, then treated the cells with increasing concentrations of  $1,25D_3$  for 24 hours post transfection. Transcriptional activity of  $\beta$ -catenin was negatively modulated by vitamin  $D_3$  over time as increasing concentrations decreased luciferase activity (Figure 5C).

To test whether  $1,25D_3$ -dependent VDR signaling inhibits  $\beta$ -catenin-induced growth promotion, we transfected R7 cells with a plasmid encoding a stabilized form of  $\beta$ -catenin ( $\Delta N$ ) [34]. Interestingly, the ability of  $1,25D_3$  to inhibit growth in non-transfected R7 controls (NT) was almost completely rescued in R7 cells with the  $\Delta N$  construct (Figure 5D). To account for the growth promoting effects of the  $\Delta N$  construct, cell number was normalized to the respective vehicle-treated control in Figure 5D. This suggests that  $1,25D_3$  inhibits R7 cell growth through suppression of active  $\beta$ -catenin levels and downstream transcriptional activity.

## VDR activation inhibits $\beta$ -catenin signaling by increasing DKK-1 expression and by displacing the transcriptional co-activator from binding sequences within the cyclin D1 promoter

Although treatment with  $1,25D_3$  for 24 hours significantly reduced  $\beta$ -catenin transcriptional activity (Figure 5C), treatment for 0.5, 1 or 6 hours had no significant effect on luciferase reporter activity (data not shown), suggesting that  $1,25D_3$  and VDR regulate  $\beta$ -catenin transcriptional activity through a VDR-mediated transcriptional component. As a well-established transcriptional target of VDR and an extracellular inhibitor

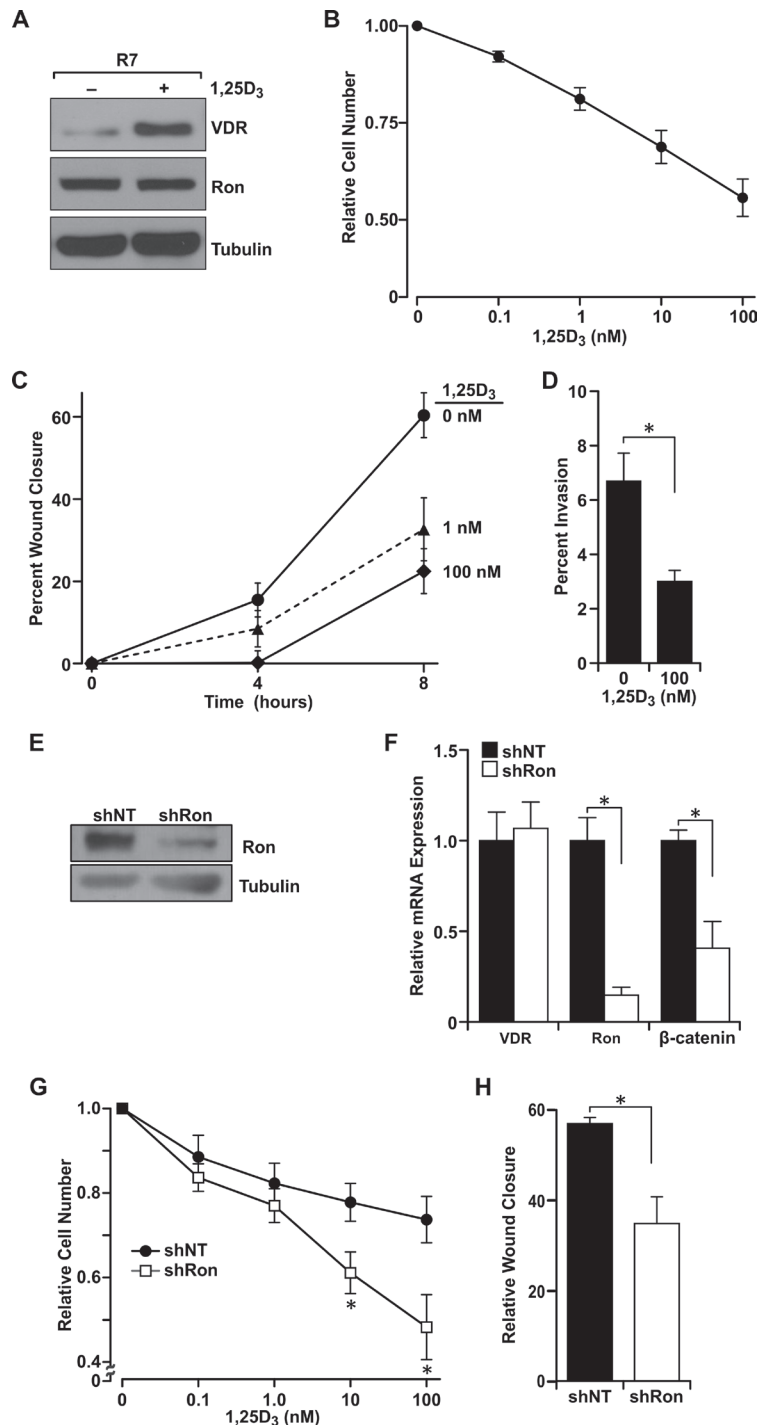

**Figure 4: Ron receptor status determines epithelial cell sensitivity to vitamin D<sub>3</sub>-mediated growth inhibition and delays in migration and invasion.** **A.** Western analysis of levels of VDR and Ron  $\pm$  100 nM 1,25D<sub>3</sub> in R7 cells. **B.** R7 cells were treated with the designated concentrations of 1,25D<sub>3</sub> for 72 hours and cell viability/number was determined by crystal violet assays. Data are normalized to vehicle treated cells set at 1 and represent mean values from three independent experiments  $\pm$  SE. **C.** R7 cells treated with the designated concentrations of 1,25D<sub>3</sub> starting at the 0 hour time point were examined in scratch assays for the percent of gap closure after 4 and 8 hours. Data represent mean values from three independent experiments  $\pm$  SE. **D.** Matrigel invasion assay with R7 cells in the presence or absence of 100 nM 1,25D<sub>3</sub>. Data represent mean values from four independent experiments  $\pm$  SE. **E.** Western blot demonstrating the reduction in Ron expression in T47D cells stably transfected with a shRon lentivirus. **F.** qRT-PCR analysis of VDR, Ron and  $\beta$ -catenin mRNA expression in control T47D cells (shNT) and Ron knockdown T47D cells (shRon). Data represent mean values from three independent experiments  $\pm$  SE. **G.** MTT assays of T47D control (shNT) and shRon cells treated with the designated concentrations of 1,25D<sub>3</sub> for 48 hours. Data represent mean values from 3-4 independent experiments per cell line  $\pm$  SE. **H.** Scratch assays in T47D control (shNT) and shRon cells treated with 100 nM 1,25D<sub>3</sub> for 24 hours. Data represent mean values normalized to the vehicle-treated control group of each cell type and are from three independent experiments  $\pm$  SE. \* $P < 0.05$

of canonical Wnt signaling upstream of  $\beta$ -catenin, Dickkopf-related protein 1 (DKK-1) mRNA levels were upregulated with increasing concentrations of  $1,25D_3$  in R7 cells (Figure 6A). DKK-1 mRNA levels from MMTV-Ron tumors but not mammary glands were also reduced with VDR ablation (Figure 6B). To verify the functional significance of elevated DKK-1 in  $1,25D_3$ -treated cells, cell growth in R7 cells with siRNA directed silencing of DKK-1 was measured (Figure 6C). Targeted knockdown

of DKK-1 significantly rescued the  $1,25D_3$ -mediated growth inhibition (Figure 6D). Collectively, our data suggest that DKK-1 is a transcriptional target of VDR that plays a role in regulating cell growth through the inhibition of canonical Wnt/ $\beta$ -catenin signaling. Of note, however, as DKK1 mRNA levels were found to be upregulated after 48 hours following  $1,25D_3$ -treatment, DKK1 is likely not involved in mediating migratory defects observed in R7 cells after 8 hours of  $1,25D_3$  exposure.

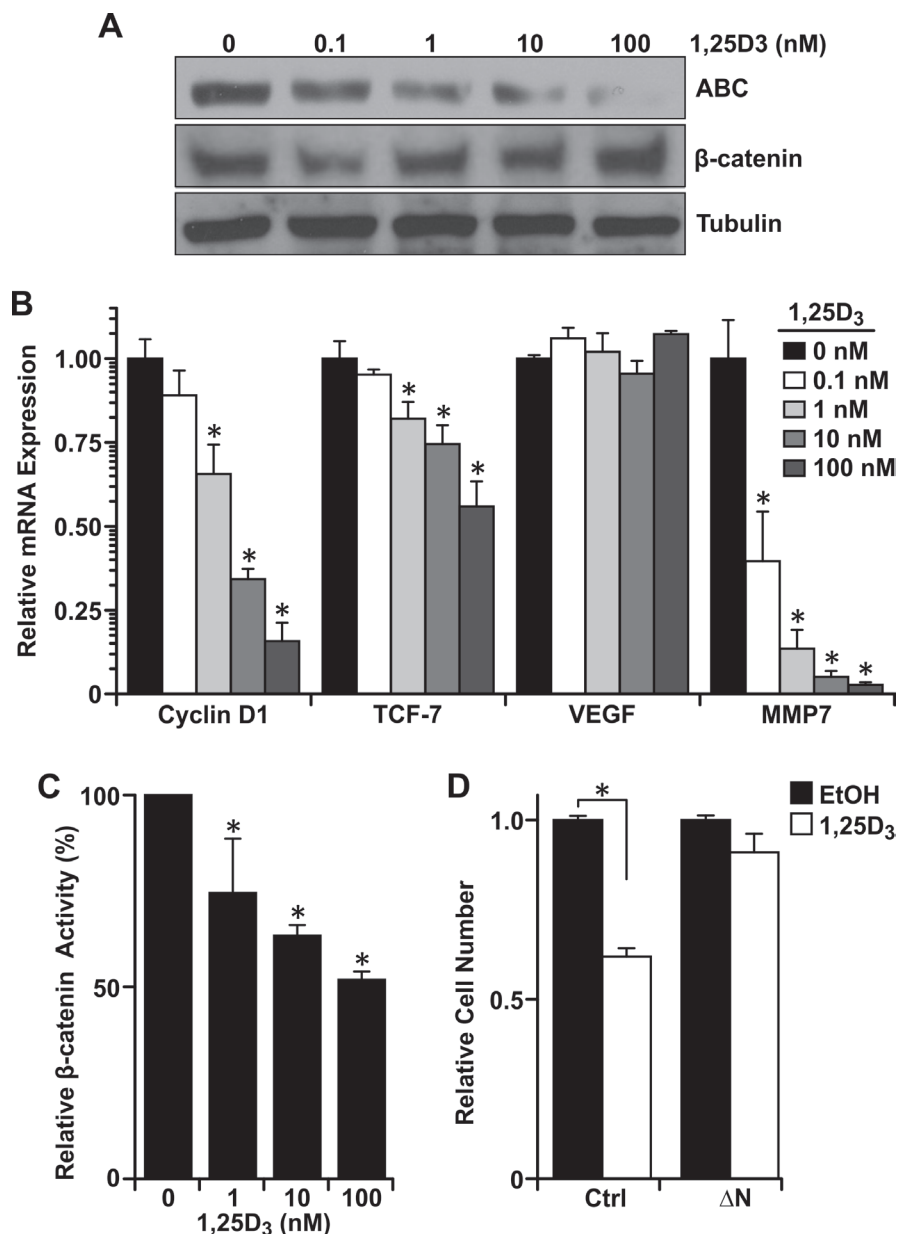

**Figure 5: Vitamin  $D_3$ -dependent VDR signaling reduces  $\beta$ -catenin transcriptional activity.** A. Western analysis demonstrating a dose-dependent reduction in active  $\beta$ -catenin (ABC) levels in R7 cells treated with the designated concentrations of  $1,25D_3$  for 48 hours, but no change in total  $\beta$ -catenin. B. qRT-PCR analysis of  $\beta$ -catenin target genes cyclin D1, TCF-7, VEGF, and MMP7 in R7 cells treated with the designated concentrations of  $1,25D_3$  for 72 hours. Data represent mean values from three independent experiments  $\pm$  SE. C. Dual luciferase assays in R7 cells co-transfected with Topflash and pRLTX (expressing *Renilla*) plasmids for 48 hours, then treated with the designated concentrations of  $1,25D_3$  for 24 hours. Luciferase activities were normalized for transfection efficiency to *Renilla* activity. Data represent mean values from three independent experiments  $\pm$  SE. D. Crystal violet staining of R7 cells transfected with a stabilized form of  $\beta$ -catenin ( $\Delta N$ ) or empty vector and treated with 100 nM  $1,25D_3$  or vehicle control (EtOH). Data represent mean values from four independent experiments  $\pm$  SE. \* $P < 0.05$



Immunoprecipitation studies were performed and demonstrated an interaction between active  $\beta$ -catenin and VDR in R7 cells (data not shown). Therefore, we

hypothesized that the ligand-dependent VDR/active  $\beta$ -catenin interaction prevents  $\beta$ -catenin from binding to TCF/LEF consensus sequences with the promoters of its

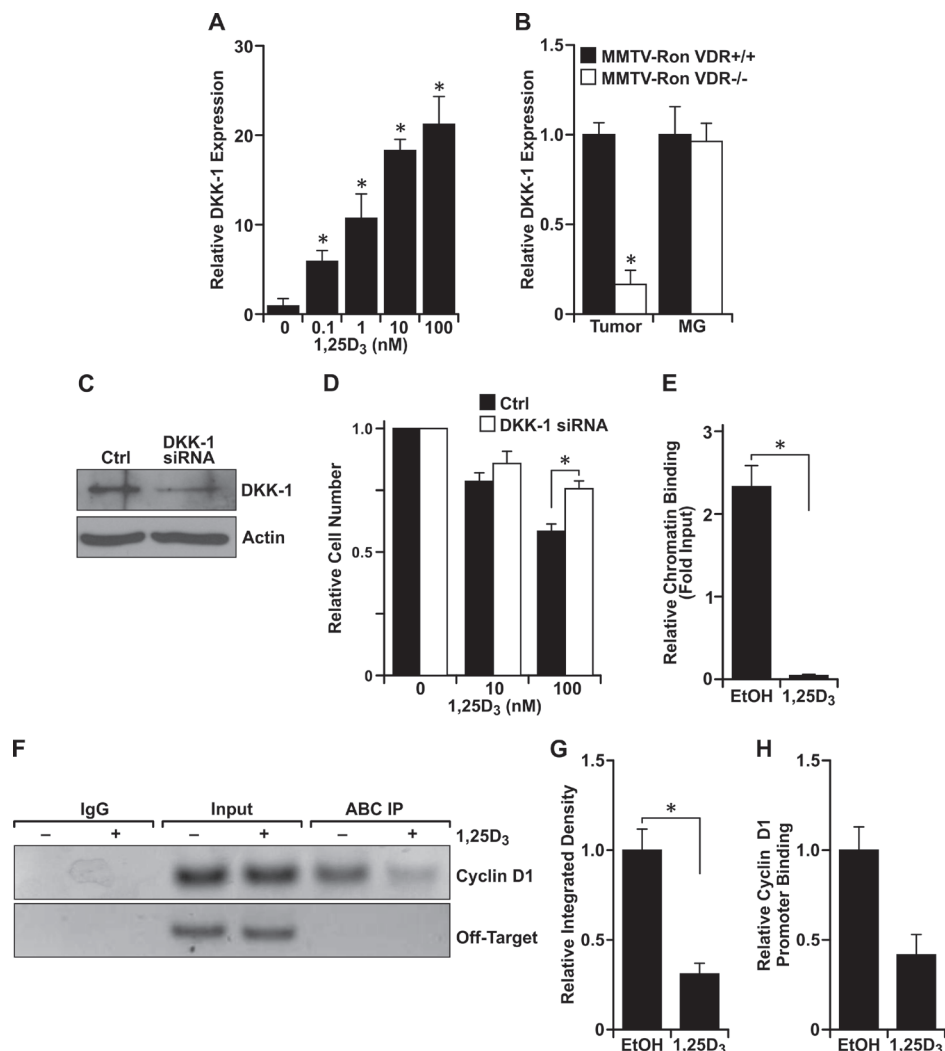

**Figure 6: Vitamin D<sub>3</sub>-dependent VDR signaling induces DKK-1 expression and binds to  $\beta$ -catenin to disrupt interaction at consensus sequences within promoters of TCF/LEF target genes.** **A.** qRT-PCR mRNA expression of DKK-1 in R7 cells treated with the designated concentrations of 1,25D<sub>3</sub> for 72 hours. Data represent mean values from three independent experiments  $\pm$  SE. **B.** qRT-PCR mRNA expression of DKK-1 in tumors and mammary glands (MG) from 8 month-old MMTV-Ron VDR<sup>+/+</sup> and VDR<sup>-/-</sup> mice demonstrating a reduction in DKK-1 levels in tumors with loss of VDR. Data represent mean values from three independent experiments  $\pm$  SE. **C.** Western blot demonstrating loss of DKK-1 protein expression with siRNA-mediated silencing in R7 cells. **D.** R7 cells transfected with siRNA against DKK-1 were treated with the designated concentrations of 1,25D<sub>3</sub> for 72 hours and cell viability/number was determined by crystal violet assays. Data are normalized to the respective vehicle treated cells set at 1 and represent mean values from two independent experiments performed in quadruplicate  $\pm$  SE. **E.** Chromatin immunoprecipitation (ChIP) assays with a mouse IgG isotype control and an anti-active  $\beta$ -catenin (ABC) antibody. ChIP-ABC quantitative real time PCR (qRT-PCR) analysis of R7 cells treated with 100 nM 1,25D<sub>3</sub> for 72 hours. The graph shows qRT-PCR on DNA purified from ChIP-ABC, using primers designed to the LEF-1 binding sequence within the mouse cyclin D1 promoter and relative to the respective input controls. Vitamin D<sub>3</sub> treatment significantly reduces enrichment compared to the vehicle control (EtOH). Data represent mean values from three independent experiments  $\pm$  SE. **F.** Representative agarose gel from ChIP-ABC PCR showing reduced cyclin D1 promoter enrichment with vitamin D<sub>3</sub> treatment in R7 cells. Negative control primers designed to a site 4000 bp upstream of the LEF-1 binding sequence within the cyclin D1 promoter (Off-Target) verify specificity of cyclin D1 primers to the sheared DNA product. **G.** Densitometry analysis of PCR products from three separate ChIP-ABC experiments supporting loss of ABC interaction with the cyclin D1 promoter. Error bars represent SE. **H.** Re-ChIP qRT-PCR analysis of R7 cells treated with 100 nM 1,25D<sub>3</sub> for 72 hours and sequentially immunoprecipitated with anti-ABC then anti-VDR antibodies. The graph shows qRT-PCR of DNA purified from ChIP-ABC-VDR, using primers designed to the LEF-1 binding sequence within the mouse cyclin D1 promoter, and showing less interaction of the ABC-VDR complex at the cyclin D1 promoter. Data represent the relative mean CT values from two experiments  $\pm$  standard deviation. \**P* < 0.05

target genes. Therefore, a chromatin immunoprecipitation assay was performed utilizing an anti-active  $\beta$ -catenin antibody and primers designed to the LEF-1 binding sequence within the mouse cyclin D1 promoter. Treatment of R7 cells with 100 nM  $1,25D_3$  significantly reduced enrichment of immunoprecipitated DNA as measured by qRT-PCR and densitometry of PCR results from agarose gels (Figures 6E, 6F and 6G). Thus, vitamin  $D_3$  disrupts the interaction of active  $\beta$ -catenin with the cyclin D1 promoter in breast cancer cells. To assess the effect of vitamin  $D_3$  on VDR-bound  $\beta$ -catenin at the cyclin D1 promoter, we next conducted sequential ChIP assays (Re-ChIP) using an antibody to pull-down active  $\beta$ -catenin, eluted the antibody/agarose complex from protein and chromatin, and then performed a second immunoprecipitation with an anti-VDR antibody. Similarly, we found that treatment with  $1,25D_3$  effectively reduced the interaction of the

VDR/active  $\beta$ -catenin complex with the LEF-1 sequence within the cyclin D1 promoter (Figure 6H).

## DISCUSSION

Ron expression is abnormally high in about 50% of primary human breast carcinomas [1]. Previous studies have shown that Ron-mediated breast tumorigenesis requires  $\beta$ -catenin activation and transcriptional activity for tumor formation, cell proliferation and metastasis [13, 14]. Due to the antagonistic role of VDR on  $\beta$ -catenin signaling in human colon cancers, in this study the role of VDR in Ron-induced mammary tumorigenesis was investigated. Our studies provide the first *in vivo* evidence for the protective role of VDR in Ron-induced tumor initiation and progression in the breast by mitigating the transcriptional activity of  $\beta$ -catenin.

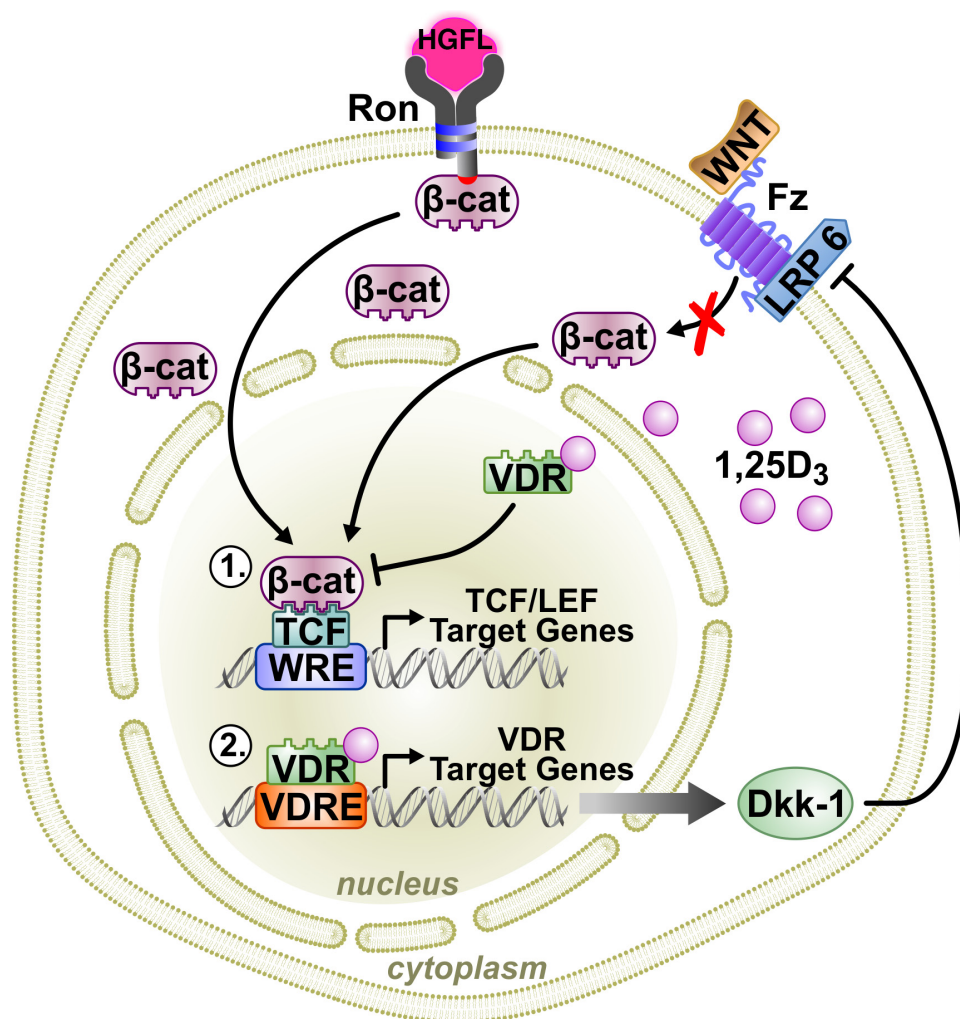

**Figure 7: A working model of VDR signaling in Ron-mediated breast cancer.** Binding of the Ron ligand, HGFL, to Ron induces  $\beta$ -catenin activation promoting breast cancer growth and metastasis when aberrantly expressed. VDR signaling in breast cancer cells antagonizes  $\beta$ -catenin activity, delaying tumor initiation and progression through two mechanisms: 1) Vitamin  $D_3$ -bound VDR can directly interact with  $\beta$ -catenin, preventing its association with TCF/LEF transcription factors thus inhibiting transcriptional activity; and, 2) ligand-dependent VDR signaling can regulate the transcription of various VDR target genes. One such VDR target includes DKK-1, which inhibits canonical Wnt signaling, thereby reducing cytosolic accumulation of  $\beta$ -catenin and nuclear localization for transcriptional activity.

While all MMTV-Ron expressing study animals eventually developed hyperplasia with ductal ectasia and regression of tertiary branches, complete loss of VDR signaling was associated with earlier mammary acinar hyperplasia, seen in mice as young as 10 weeks of age. Similarly, MMTV-Ron VDR<sup>-/-</sup> mice exhibited significantly shorter tumor latency than VDR heterozygous and homozygous littermates. Together, our *in vivo* data suggest that the presence of at least one VDR allele participates to delay Ron-induced mammary tumorigenesis.

To understand the role of VDR in the regulation of Ron-induced tumorigenesis, we utilized R7 mammary tumor cells and the human breast cancer cell line, T47D, with and without a targeted Ron knockdown (KD). 1,25D<sub>3</sub> has previously been shown to inhibit the growth of a variety of normal and transformed epithelial cells, including T47D cells (reviewed in [35-37]). In concurrence, we demonstrate the potent regulatory effects of 1,25D<sub>3</sub> on R7 and T47D cell number, migration and invasion despite the high Ron expression in both cell lines [14]. Additionally, Ron KD significantly reduced T47D cell number and migration even more than shNT controls at high concentrations of vitamin D<sub>3</sub> suggesting that loss of Ron may sensitize cells to 1,25D<sub>3</sub>-mediated inhibition of growth and tumor progression. Furthermore, when R7 cells were transfected with a mutated  $\beta$ -catenin construct for enhanced activity, the effects of 1,25D<sub>3</sub> on cell number were significantly reduced. Together, these data elucidate the potent ability of  $\beta$ -catenin signaling to evade the protective effects of vitamin D<sub>3</sub> in Ron-overexpressing breast cancer cells, and suggest a role for dual-therapies targeting the  $\beta$ -catenin and/or Ron signaling pathways in combination with vitamin D<sub>3</sub> or vitamin D<sub>3</sub> analogs.

Active  $\beta$ -catenin protein levels were significantly higher in VDR deficient mammary glands, which correlated with elevated levels of cyclin D1 and c-Myc. Evidence of enhanced  $\beta$ -catenin transcriptional activity with loss of VDR was further substantiated by significantly elevated mRNA levels of  $\beta$ -catenin target genes cyclin D1, TCF-7 and MMP7. Similar to the *in vivo* studies with VDR deletion, loss of active  $\beta$ -catenin levels were observed in R7 cells treated with 1,25D<sub>3</sub> that correlated with reduced expression of  $\beta$ -catenin target genes. Numerous studies have linked aberrant  $\beta$ -catenin signaling with epithelial to mesenchymal transition (EMT) and invasiveness in human cancer [38, 39]. It has recently been shown that VDR signaling inhibits epithelial to mesenchymal transition and the metastatic potential of human and mouse breast cancer cells induced by tumor associated macrophages *in vitro* and in an orthotopic model of breast cancer [33]. Moreover, VDR expression negatively correlates with human breast cancer metastasis. Although TCF-7 expression in breast cancer cells is largely unexplored, TCF-7 is activated in colorectal cancer, leading to metastatic behavior by overproduction

of lymphoid tyrosine protein kinase p56 [40]. Increased TCF-7 gene expression in MMTV-Ron VDR<sup>-/-</sup> tumors and decreased expression in response to 1,25D<sub>3</sub> in R7 cells may suggest a mechanism by which VDR mitigates metastatic burden in Ron-overexpressing breast cancers. However, future work is needed to verify the potential for reduced metastasis with VDR-mediated downregulation of TCF-7.

In normal and transformed epithelial cells, matrix metalloproteinases (MMPs) play important roles in cell migration, invasion, proliferation, apoptosis, angiogenesis, and host defenses through various mechanisms; mainly the regulation of ECM proteins in the microenvironment (reviewed in [41]). Interestingly, MMP7 can enhance the growth rate of normal mammary epithelial cells and promote tumor formation *in vivo* [42]. Enhanced expression of MMP7 in MMTV-Ron VDR<sup>-/-</sup> mammary tumors and, conversely, reduced expression in R7 cells treated with 1,25D<sub>3</sub> suggests a mechanism by which ligand-dependent VDR signaling delays tumor formation and mitigates progression.

Similar to colon cancer, 1,25D<sub>3</sub> dose-dependently increased expression of the extracellular canonical Wnt inhibitor, DKK-1, in R7 cells while loss of VDR in MMTV-Ron mice reduced tumoral DKK-1 mRNA. Functionally, 1,25D<sub>3</sub>-stimulated DKK-1 expression was associated with growth inhibition. These data suggest a working model by which VDR inhibits Wnt/ $\beta$ -catenin signaling and breast cancer in MMTV-Ron mice through the transcriptional regulation of DKK-1 expression (Figure 7). DKK-1 suppresses  $\beta$ -catenin cytosolic accumulation, nuclear translocation and transcriptional activity by inhibiting the Wnt co-receptor low density lipoprotein receptor-related protein 6 (LRP6) from binding to Frizzled [43]. Interestingly, there is appreciable evidence of crosstalk between the Ron and canonical Wnt signaling pathways involving downstream activation of ERK [44], which can phosphorylate LRP6 for enhanced Wnt signaling [45] and inactivation of GSK-3 $\beta$  [46], both resulting in elevated levels of  $\beta$ -catenin. Additionally, previous studies have shown that oncogenic Ron can intensify  $\beta$ -catenin signaling through activation of dishevelled [12]. However, more work is needed to understand the interactions between the Ron and canonical Wnt signaling pathways in directing  $\beta$ -catenin activation.

Analogous to previous studies in colon cancer showing direct interaction of VDR and  $\beta$ -catenin [32, 47], we found that active  $\beta$ -catenin had significantly less interaction with the cyclin D1 promoter after 1,25D<sub>3</sub> treatment in mammary tumor cells. Moreover, enrichment of the VDR/active  $\beta$ -catenin complex at the cyclin D1 promoter was also markedly reduced in the presence of 1,25D<sub>3</sub>. These data support a model suggesting that the ability of ligand-bound VDR to directly reduce  $\beta$ -catenin transcriptional activity is by sequestering  $\beta$ -catenin from its TCF/LEF target genes (Figure 7).

In summary, our data show that VDR plays a protective role in Ron-mediated breast tumorigenesis and progression by both direct and indirect mechanisms that antagonize  $\beta$ -catenin transcriptional activity. Many studies utilizing vitamin D<sub>3</sub> [48, 49] or vitamin D<sub>3</sub> analogs [50-54] have shown a protective role against breast cancer development, progression, and metastasis. The mechanisms include inhibition of angiogenesis [48], induction of cell cycle arrest at the G1/S checkpoint [49], promotion of apoptosis [50, 51], and reduced overall tumor growth [53]. Similarly, many therapeutic agents targeting Ron and/or other receptor tyrosine kinases have also demonstrated efficacy in preclinical and clinical trials [55]. These include monoclonal antibodies that neutralize HGFL-dependent Ron signaling [56-60], small molecule inhibitors targeting Ron [61], and the use of anti-Ron antibodies for the delivery of cytotoxic drugs in Ron-overexpressing cancers [62]. Results from Ron-targeted treatments have demonstrated reductions in cell migration *in vitro* [56, 58], decreased tumor growth *in vivo* [57, 59], and enhanced sensitivity to additional cytotoxic drugs [57, 60]. However, other studies have shown that singular therapies targeting Ron [56] or dietary supplementation with vitamin D<sub>3</sub> (reviewed in [63-65]) is not sufficient to block tumor growth and progression. Aberrant downstream  $\beta$ -catenin activation with Ron overexpression is likely a strong contributor to tumorigenesis in the breast, although we recognize this pathway may not be the only tumor-driving mechanism. Also, due to the ability of 1,25D<sub>3</sub>/VDR signaling to regulate many cellular functions in the breast, we postulate that VDR-dependent suppression of Ron-induced mammary tumorigenesis is likely multifactorial and not necessarily limited to antagonizing the  $\beta$ -catenin pathway. However, our study herein strongly implicates the potential for combination therapies targeting Ron, or more specifically  $\beta$ -catenin signaling, and treatment with vitamin D<sub>3</sub> or potent vitamin D<sub>3</sub> analogs that may benefit patients with aggressive, Ron-mediated breast cancer.

## MATERIALS AND METHODS

### Mice

VDR knockout (VDR<sup>-/-</sup>) animals [66] were crossed to MMTV-Ron mice [13] to generate litters heterozygous for VDR. Littermates were then crossed to generate mice homozygous, heterozygous, or null for VDR all with Ron overexpression specific to the mammary epithelium. All animals were continuously maintained on a diet high in calcium (2%), phosphorous (1.25%), and lactose (20%) containing 2.2 IU Vitamin D<sub>3</sub>/g (Research Diets, New Brunswick, NJ). Two hours before sacrifice, mice were injected with 3 mg/mL BrdU. All mice were maintained

under specific pathogen-free conditions and were treated and euthanized in accord with protocols approved by the University of Cincinnati Institutional Animal Care and Use Committee.

### Whole mount preparation

Inguinal mammary glands were isolated and processed as previously described [67]. Images were taken using Axiovision 4.5 Software (Jena, Germany). A minimum of 8 mice per genotype was used for verification of hyperplasia.

### Histological staining

Formalin-fixed, paraffin-embedded right inguinal mammary glands, lungs, liver, and tumors from 2, 4, 6, 8, 10 and 12-month mice were cut into 5 micrometer tissue sections and stained with hematoxylin and eosin Y for gross morphological assessment. Tissue sections from each mouse at each time point were assessed for hyperplasia in the mammary gland and metastasis in the lungs and liver. Metastases were verified histologically and by immunohistochemical staining for Ron expression. Mammary glands from eight month-old MMTV-Ron VDR<sup>+/+</sup> and VDR<sup>-/-</sup> mice were assessed for  $\beta$ -catenin expression by immunohistochemistry. Briefly, antigen retrieval was performed in citrate buffer, tissues were quenched for endogenous peroxide, blocked in goat serum, and the primary antibody against  $\beta$ -catenin (Cell Signaling, Danvers, MA, 1:100) or Ron (Santa Cruz Biotechnology, Santa Cruz, CA, 1:100) was incubated at 4°C overnight. Detection of  $\beta$ -catenin or Ron staining was detected with 3,3'-diaminobenzidine (Sigma-Aldrich, St Louis, MO). Staining was analyzed at 40X magnification using ImageJ Software (National Institutes of Health, Bethesda, MD). A minimum of eight animals per genotype was evaluated with two sections per animal.

### Western blotting

Whole thoracic mammary glands from 6 month-old mice, R7 cells, T47D shNT cells or T47D shRon cells were homogenized in RIPA lysis buffer, sonicated, and measured for protein concentration using a BCA protein assay. Immunoblotting was carried out using antibodies targeting VDR-D6 (Santa Cruz), Ron (Santa Cruz), active  $\beta$ -catenin (ABC, clone 8E7, Millipore, Billerica, MA), total  $\beta$ -catenin (Cell Signaling), cyclin D1 (Cell Signaling), c-Myc (Cell Signaling), DKK-1 (Santa Cruz) and tubulin (Santa Cruz).

## ChIP/Re-ChIP

R7 cells treated with 100 nM 1,25D<sub>3</sub> or EtOH (vehicle control) were fixed in 37% formalin, digested and sheared to a length between 200 and 2000 bp. Lysates were precleared with mouse IgG and immunoprecipitated with 5 µg of an anti-active β-catenin antibody (ABC) or anti-active β-catenin followed by secondary immunoprecipitation with 5 µg of an anti-VDR (D6) antibody. Chromatin and protein crosslinks were removed with 5M NaCl and DNA was purified using the QIAquick PCR Purification Kit (Qiagen, Venlo, Limburg) according to the manufacturer's instructions. Primer sets designed to encompass the β-catenin/LEF-1 recognition sequence in the mouse cyclin D1 promoter were utilized for qRT-PCR for examination of interactions with active β-catenin. The following primer sequences were used: (5'-TTCTCTGCCCGCTTTGAT-3') and (5'-AACTTCAACAAAACCTCCCCTGTAGTC-3'); and to an 'off-target' site without a β-catenin binding element approximately 4000 bp upstream, within the cyclin D1 promoter: (5'-AGAGACAGGCATCCCATTGGT-3') and (5'-CAGGTCAGAGTGCTTGCTGATT-3').

## Quantitative real time PCR (qRT-PCR)

Total RNA was isolated from whole mammary glands, R7 cells, or human T47D cells using Tri-Reagent RT (Molecular Research Center, Inc., Cincinnati, OH) and subsequently reverse transcribed into cDNA (1.5 µg) using the High Capacity cDNA Reverse Transcription Kit (Applied Biosystems, Foster City, CA). Between four and eight experimental cDNA samples were analyzed for VDR, Ron, β-catenin, cyclin D1, c-Myc, MMP7, TCF-7, VEGF, and DKK-1 mRNA expression in duplicate by real time PCR analysis using FastStart SYBR Green Master (Roche Diagnostics, Indianapolis, IN). The following forward and reverse mouse primer sets were used: VDR (5'-GAAGCGCAAGGCCCTGTT-3') and (5'-CGCTGCACCTCCTCATCTGT-3'); Ron (5'-TCCCATTGCAGGTCTGTGTAGA-3') and (5'-CGGAAGCTGTATCGTTGATGTC-3'); β-catenin (5'-TCCCTGAGACGCTAGATGAGG-3') and (5'-CGTTTAGCAGTTTTGTGTCAGCTC-3'); cyclin D1 (5'-GCGTACCTGACACCAATCTC-3') and (5'-CTCCTCTTCGCACTTCTGCTC-3'); c-Myc (5'-TAACTCGAGGAGGAGCTGGA-3') and (5'-GCCAAGGTGTGAGGTTAGG-3'); TCF-7 (5'-AGCATCCGCAGCCTCAAC-3') and (5'-AGCGGCCTGTGAACTCCTT-3'); VEGF (5'-GCAGAAGTCCCATGAAGTGA-3') and (5'-TCCAGGGCTTCATCGTTA-3'); MMP7 (5'-CTGCCACTGTCCCAGGAAG-3') and (5'-GGGAGAGTTTTCCAGTCATGG-3'); DKK-1 (5'-CCTTCGGAGATGATGGTTGT-3') and (5'-

GTTCTGATCGCGTTGGAAT-3'). Gene expression was normalized to 18S rRNA and reported as relative expression compared to the wild type control.

## Cell culture

R7 murine breast cancer cells were derived from a mouse mammary tumor from MMTV-Ron mice as previously described [13]. Human T47D cells were purchased from American Type Culture Collection (Manassas, VA) were previously infected with a non-target (T47D shNT) control or Ron shRNA lentivirus (cat#RHS3979-9571732) purchased from Open Biosystems (Huntsville, AL). Polyclonal stable cell lines were generated as previously described [14].

## Dual luciferase assay

R7 cells were dual-transfected with the TCF reporter plasmid TOP-FLASH (2 µg; Upstate Biotechnology, Lake Placid, NY, USA) expressing firefly luciferase and 2 sets of 3 copies of the TCF binding site, and pRLTX expressing *Renilla* luciferase (0.04 µg; Clontech, Mountain View, CA) with Lipofectamine 2000 (Invitrogen, Carlsbad, CA) for 48 h. The cells were then treated with 1,25D<sub>3</sub> (100 nM) for 24 hours followed by determination of luciferase activity according to the manufacturer's instructions (Promega, Madison, WI). Values were normalized to *Renilla* luciferase expression.

## Cell viability/MTT/crystal violet

R7 and T47D cells were seeded in a 12-well or 24-well plate, respectively, at a density of 5,000 (R7) or 25,000 (T47D and T47D shRon) cells per well and allowed to adhere overnight. Fresh media was placed onto the cells with or without the indicated concentration of 1,25D<sub>3</sub>. After 48 hours, the media was aspirated from T47D cells and 1 mg/ml thiazolyl blue tetrazolium bromide (Sigma-Aldrich) was added for 60 minutes prior to incubation with DMSO. Absorbance was measured at 570 nm. After 72 hours, the media was aspirated from R7 cells which were then washed with 1X PBS, fixed in 4% paraformaldehyde for 10 minutes, and stained with crystal violet for 60 minutes. Images were taken at 20X using Axiovision 4.5 Software (Jena, Germany) and viable cells were counted manually using ImageJ Software (National Institutes of Health).

## Transfection with β-catenin constructs and siRNA

R7 cells were transfected with a plasmid construct (5 µg/1:10<sup>6</sup> cells) containing a stabilized form of β-catenin (ΔN) [34] using the Amaxa Nucleofector 2b Device

(Lonza, Alpharette, GA) according to the manufacturer's instructions. Transfection efficiency was roughly 35% in R7 cells (data not shown). The cells were treated with 1,25D<sub>3</sub> (100 nM) for 72 hours followed by determination of cell number using a crystal violet assay. DKK-1 siRNA (25 nM; Santa Cruz) was transfected into R7 cells using the Amaxa Nucleofector 2b Device according to the manufacturer's instructions. Targeted DKK-1 knockdown was confirmed via Western blot 48 hours post transfection. Cells were utilized for cell growth/viability assays with or without 1,25D<sub>3</sub> as described above.

### Scratch/cell migration assay

R7, T47D, and T47D shRon cells were seeded in a 6-well plate labeled with a vertical line across the diameter of each well and seeded at a density of 50,000 (R7) or 100,000 (T47D and T47D shRon) cells/well. Cells were grown to 80% confluence then three horizontal scratches perpendicular to the labeled diameter line were inscribed across each well using a sterile p-200 pipette tip. The media was changed and 1,25D<sub>3</sub> or EtOH (vehicle control) was added to each well at the designated concentration. Images were taken at 5X magnification at 0, 4, 8, and 24 hours after treatment. The length of each scratch was calculated from three measurements per image and percent wound closure was measured using ImageJ Software (National Institutes of Health). Cell number was also measured via MTT (as described above) at the designated time points to account for differences in growth rate.

### Cell invasion/matrigel assay

R7 cells were seeded at a density of 50,000 cells/well in 6.5 mm transwell inserts (8.0 μm pore size) in a 24-well plate above a 70 μL-thick growth factor reduced matrigel matrix (BD Biosciences, San Jose, CA). Cells were plated in serum-free media in the presence of 100 nM 1,25D<sub>3</sub> or EtOH (vehicle control). Below the insert, culture media containing 10% FBS was added as a chemoattractant. Cell invasion was quantified after 48 hours by measuring the viability (MTT) of cells that had traversed the matrigel matrix.

### Statistical analyses

Statistical analysis was conducted using GraphPad Prism software (La Jolla, CA). For observance of mammary gland hyperplasia, Chi-square analysis was utilized for identifying differences between MMTV-Ron VDR+/+ and MMTV-Ron VDR-/- mice. Student's t tests or analysis of variance (ANOVA) tests were applied to determine significant differences. Data are expressed as the mean ± standard error (SE). A P-value <0.05 was

regarded as significant.

## ACKNOWLEDGMENTS

This work was supported by the Susan G. Komen Breast Cancer Foundation Grant KG090377 and The Veterans Hospital Medical Center Merit Grant BX000803. The authors would like to thank Jessica Mace for her help with the various *in vitro* assays, and Glenn Doerman for his technical assistance in creating the figures.

## CONFLICTS OF INTEREST

There is no conflict of interest.

## REFERENCES

1. Maggiora P, Marchio S, Stella MC, Gai M, Belfiore A, De Bortoli M, Di Renzo MF, Costantino A, Sismondi P and Comoglio PM. Overexpression of the RON gene in human breast carcinoma. *Oncogene*. 1998; 16:2927-2933.
2. Lee WY, Chen HH, Chow NH, Su WC, Lin PW and Guo HR. Prognostic significance of co-expression of RON and MET receptors in node-negative breast cancer patients. *Clin Cancer Res*. 2005; 11:2222-2228.
3. Welm AL, Sneddon JB, Taylor C, Nuyten DS, van de Vijver MJ, Hasegawa BH and Bishop JM. The macrophage-stimulating protein pathway promotes metastasis in a mouse model for breast cancer and predicts poor prognosis in humans. *Proceedings of the National Academy of Sciences of the United States of America*. 2007; 104:7570-7575.
4. Kretschmann KL, Eyob H, Buys SS and Welm AL. The macrophage stimulating protein/Ron pathway as a potential therapeutic target to impede multiple mechanisms involved in breast cancer progression. *Current drug targets*. 2010; 11:1157-1168.
5. Gaudino G, Follenzi A, Naldini L, Collesi C, Santoro M, Gallo KA, Godowski PJ and Comoglio PM. RON is a heterodimeric tyrosine kinase receptor activated by the HGF homologue MSP. *The EMBO journal*. 1994; 13:3524-3532.
6. Wang J, Rajput A, Kan JL, Rose R, Liu XQ, Kuropatwinski K, Hauser J, Beko A, Dominquez I, Sharratt EA, Brattain L, Levea C, Sun FL, Keane DM, Gibson NW and Brattain MG. Knockdown of Ron kinase inhibits mutant phosphatidylinositol 3-kinase and reduces metastasis in human colon carcinoma. *The Journal of biological chemistry*. 2009; 284:10912-10922.
7. Wang MH, Montero-Julian FA, Dauny I and Leonard EJ. Requirement of phosphatidylinositol-3 kinase for epithelial cell migration activated by human macrophage stimulating protein. *Oncogene*. 1996; 13:2167-2175.
8. Santoro MM, Penengo L, Minetto M, Orecchia S, Cilli M and Gaudino G. Point mutations in the tyrosine kinase

domain release the oncogenic and metastatic potential of the Ron receptor. *Oncogene*. 1998; 17:741-749.

9. Li BQ, Wang MH, Kung HF, Ronsin C, Breathnach R, Leonard EJ and Kamata T. Macrophage-stimulating protein activates Ras by both activation and translocation of SOS nucleotide exchange factor. *Biochemical and biophysical research communications*. 1995; 216:110-118.
10. Cheng HL, Liu HS, Lin YJ, Chen HH, Hsu PY, Chang TY, Ho CL, Tzai TS and Chow NH. Co-expression of RON and MET is a prognostic indicator for patients with transitional-cell carcinoma of the bladder. *British journal of cancer*. 2005; 92:1906-1914.
11. Danilkovitch-Miagkova A, Miagkov A, Skeel A, Nakaigawa N, Zbar B and Leonard EJ. Oncogenic mutants of RON and MET receptor tyrosine kinases cause activation of the beta-catenin pathway. *Molecular and cellular biology*. 2001; 21:5857-5868.
12. Xu XM, Zhou YQ and Wang MH. Mechanisms of cytoplasmic {beta}-catenin accumulation and its involvement in tumorigenic activities mediated by oncogenic splicing variant of the receptor originated from Nantes tyrosine kinase. *The Journal of biological chemistry*. 2005; 280:25087-25094.
13. Zinser GM, Leonis MA, Toney K, Pathrose P, Thobe M, Kader SA, Peace BE, Beauman SR, Collins MH and Waltz SE. Mammary-specific Ron receptor overexpression induces highly metastatic mammary tumors associated with beta-catenin activation. *Cancer research*. 2006; 66:11967-11974.
14. Wagh PK, Gray JK, Zinser GM, Vasiliauskas J, James L, Monga SP and Waltz SE. beta-Catenin is required for Ron receptor-induced mammary tumorigenesis. *Oncogene*. 2011; 30:3694-3704.
15. Lin SY, Xia W, Wang JC, Kwong KY, Spohn B, Wen Y, Pestell RG and Hung MC. Beta-catenin, a novel prognostic marker for breast cancer: its roles in cyclin D1 expression and cancer progression. *Proceedings of the National Academy of Sciences of the United States of America*. 2000; 97:4262-4266.
16. Lopez-Knowles E, Zardawi SJ, McNeil CM, Millar EK, Crea P, Musgrove EA, Sutherland RL and O'Toole SA. Cytoplasmic localization of beta-catenin is a marker of poor outcome in breast cancer patients. *Cancer Epidemiol Biomarkers Prev*. 2010; 19:301-309.
17. Dolled-Filhart M, McCabe A, Giltneane J, Cregger M, Camp RL and Rimm DL. Quantitative in situ analysis of beta-catenin expression in breast cancer shows decreased expression is associated with poor outcome. *Cancer research*. 2006; 66:5487-5494.
18. Chung GG, Zerkowski MP, Ocal IT, Dolled-Filhart M, Kang JY, Psyrrri A, Camp RL and Rimm DL. beta-Catenin and p53 analyses of a breast carcinoma tissue microarray. *Cancer*. 2004; 100:2084-2092.
19. Bukholm IK, Nesland JM, Karesen R, Jacobsen U and Borresen-Dale AL. E-cadherin and alpha-, beta-, and gamma-catenin protein expression in relation to metastasis in human breast carcinoma. *The Journal of pathology*. 1998; 185:262-266.
20. Bankfalvi A, Terpe HJ, Breukelmann D, Bier B, Rempe D, Pschadka G, Krech R, Lelle RJ and Boecker W. Immunophenotypic and prognostic analysis of E-cadherin and beta-catenin expression during breast carcinogenesis and tumour progression: a comparative study with CD44. *Histopathology*. 1999; 34:25-34.
21. Wagh PK, Zinser GM, Gray JK, Shrestha A and Waltz SE. Conditional deletion of beta-catenin in mammary epithelial cells of Ron receptor, Mst1r, overexpressing mice alters mammary tumorigenesis. *Endocrinology*. 2012; 153:2735-2746.
22. Chiang KC and Chen TC. The anti-cancer actions of vitamin D. *Anti-cancer agents in medicinal chemistry*. 2013; 13:126-139.
23. Narvaez CJ, Matthews D, LaPorta E, Simmons KM, Beaudin S and Welsh J. The impact of vitamin D in breast cancer: genomics, pathways, metabolism. *Frontiers in physiology*. 2014; 5:213.
24. Lopes N, Paredes J, Costa JL, Ylstra B and Schmitt F. Vitamin D and the mammary gland: a review on its role in normal development and breast cancer. *Breast Cancer Res*. 2012; 14:211.
25. Welsh J. Vitamin D metabolism in mammary gland and breast cancer. *Molecular and cellular endocrinology*. 2011; 347:55-60.
26. Larriba MJ, Gonzalez-Sancho JM, Barbachano A, Niell N, Ferrer-Mayorga G and Munoz A. Vitamin D Is a Multilevel Repressor of Wnt/b-Catenin Signaling in Cancer Cells. *Cancers*. 2013; 5:1242-1260.
27. Palmer HG, Gonzalez-Sancho JM, Espada J, Berciano MT, Puig I, Baulida J, Quintanilla M, Cano A, de Herreros AG, Lafarga M and Munoz A. Vitamin D(3) promotes the differentiation of colon carcinoma cells by the induction of E-cadherin and the inhibition of beta-catenin signaling. *The Journal of cell biology*. 2001; 154:369-387.
28. Larriba MJ, Ordonez-Moran P, Chicote I, Martin-Fernandez G, Puig I, Munoz A and Palmer HG. Vitamin D receptor deficiency enhances Wnt/beta-catenin signaling and tumor burden in colon cancer. *PLoS one*. 2011; 6:e23524.
29. Orsulic S, Huber O, Aberle H, Arnold S and Kemler R. E-cadherin binding prevents beta-catenin nuclear localization and beta-catenin/LEF-1-mediated transactivation. *Journal of cell science*. 1999; 112:1237-1245.
30. Aguilera O, Pena C, Garcia JM, Larriba MJ, Ordonez-Moran P, Navarro D, Barbachano A, Lopez de Silanes I, Ballestar E, Fraga MF, Esteller M, Gamallo C, Bonilla F, Gonzalez-Sancho JM and Munoz A. The Wnt antagonist DICKKOPF-1 gene is induced by 1alpha,25-dihydroxyvitamin D3 associated to the differentiation of

- human colon cancer cells. *Carcinogenesis*. 2007; 28:1877-1884.
31. Beildeck ME, Islam M, Shah S, Welsh J and Byers SW. Control of TCF-4 expression by VDR and vitamin D in the mouse mammary gland and colorectal cancer cell lines. *PLoS one*. 2009; 4:e7872.
  32. Shah S, Islam MN, Dakshnamurthy S, Rizvi I, Rao M, Herrell R, Zinser G, Valrance M, Aranda A, Moras D, Norman A, Welsh J and Byers SW. The molecular basis of vitamin D receptor and beta-catenin crossregulation. *Molecular cell*. 2006; 21:799-809.
  33. Zhang Y, Guo Q, Zhang Z, Bai N, Liu Z, Xiong M, Wei Y, Xiang R and Tan X. VDR Status Arbitrates the Prometastatic Effects of Tumor-Associated Macrophages. *Mol Cancer Res*. 2014; 12:1181-1191.
  34. Yost C, Torres M, Miller JR, Huang E, Kimelman D and Moon RT. The axis-inducing activity, stability, and subcellular distribution of beta-catenin is regulated in *Xenopus* embryos by glycogen synthase kinase 3. *Genes & development*. 1996; 10:1443-1454.
  35. Samuel S and Sitrin MD. Vitamin D's role in cell proliferation and differentiation. *Nutrition reviews*. 2008; 66(10 Suppl 2):S116-124.
  36. Ingraham BA, Bragdon B and Nohe A. Molecular basis of the potential of vitamin D to prevent cancer. *Current medical research and opinion*. 2008; 24:139-149.
  37. Colston KW and Hansen CM. Mechanisms implicated in the growth regulatory effects of vitamin D in breast cancer. *Endocrine-related cancer*. 2002; 9:45-59.
  38. Jiang YG, Luo Y, He DL, Li X, Zhang LL, Peng T, Li MC and Lin YH. Role of Wnt/beta-catenin signaling pathway in epithelial-mesenchymal transition of human prostate cancer induced by hypoxia-inducible factor-1alpha. *International journal of urology : official journal of the Japanese Urological Association*. 2007; 14:1034-1039.
  39. Sanchez-Tillo E, de Barrios O, Siles L, Cuatrecasas M, Castells A and Postigo A. beta-catenin/TCF4 complex induces the epithelial-to-mesenchymal transition (EMT)-activator ZEB1 to regulate tumor invasiveness. *Proceedings of the National Academy of Sciences of the United States of America*. 2011; 108:19204-19209.
  40. Mayer K, Hieronymus T, Castrop J, Clevers H and Ballhausen WG. Ectopic activation of lymphoid high mobility group-box transcription factor TCF-1 and overexpression in colorectal cancer cells. *International journal of cancer*. 1997; 72:625-630.
  41. Egeblad M and Werb Z. New functions for the matrix metalloproteinases in cancer progression. *Nature reviews*. 2002; 2:161-174.
  42. Lynch CC, Vargo-Gogola T, Martin MD, Fingleton B, Crawford HC and Matrisian LM. Matrix metalloproteinase 7 mediates mammary epithelial cell tumorigenesis through the ErbB4 receptor. *Cancer research*. 2007; 67:6760-6767.
  43. Bafico A, Liu G, Yaniv A, Gazit A and Aaronson SA. Novel mechanism of Wnt signalling inhibition mediated by Dickkopf-1 interaction with LRP6/Arrow. *Nature cell biology*. 2001; 3:683-686.
  44. Bikkavilli RK and Malbon CC. Mitogen-activated protein kinases and Wnt/beta-catenin signaling: Molecular conversations among signaling pathways. *Communicative & integrative biology*. 2009; 2:46-49.
  45. Krejci P, Aklian A, Kaucka M, Sevcikova E, Prochazkova J, Masek JK, Mikolka P, Pospisilova T, Spoustova T, Weis M, Paznekas WA, Wolf JH, Gutkind JS, Wilcox WR, Kozubik A, Jabs EW, et al. Receptor tyrosine kinases activate canonical WNT/beta-catenin signaling via MAP kinase/LRP6 pathway and direct beta-catenin phosphorylation. *PLoS one*. 2012; 7:e35826.
  46. Ding Q, Xia W, Liu JC, Yang JY, Lee DF, Xia J, Bartholomeusz G, Li Y, Pan Y, Li Z, Bargou RC, Qin J, Lai CC, Tsai FJ, Tsai CH and Hung MC. Erk associates with and primes GSK-3beta for its inactivation resulting in upregulation of beta-catenin. *Molecular cell*. 2005; 19:159-170.
  47. He W, Kang YS, Dai C and Liu Y. Blockade of Wnt/beta-catenin signaling by paricalcitol ameliorates proteinuria and kidney injury. *J Am Soc Nephrol*. 2011; 22:90-103.
  48. Mantell DJ, Owens PE, Bundred NJ, Mawer EB and Canfield AE. 1 alpha,25-dihydroxyvitamin D(3) inhibits angiogenesis *in vitro* and *in vivo*. *Circulation research*. 2000; 87:214-220.
  49. Jensen SS, Madsen MW, Lukas J, Binderup L and Bartek J. Inhibitory effects of 1alpha,25-dihydroxyvitamin D(3) on the G(1)-S phase-controlling machinery. *Molecular endocrinology (Baltimore, Md)*. 2001; 15:1370-1380.
  50. Chiang KC, Chen SC, Yeh CN, Pang JH, Shen SC, Hsu JT, Liu YY, Chen LW, Kuo SF, Takano M, Kittaka A, Sun CC, Juang HH and Chen TC. MART-10, a less calcemic vitamin D analog, is more potent than 1alpha,25-dihydroxyvitamin D3 in inhibiting the metastatic potential of MCF-7 breast cancer cells *in vitro*. *The Journal of steroid biochemistry and molecular biology*. 2014; 139:54-60.
  51. Sundaram S, Chaudhry M, Reardon D, Gupta M and Gewirtz DA. The vitamin D3 analog EB 1089 enhances the antiproliferative and apoptotic effects of adriamycin in MCF-7 breast tumor cells. *Breast cancer research and treatment*. 2000; 63:1-10.
  52. Chaudhry M, Sundaram S, Gennings C, Carter H and Gewirtz DA. The vitamin D3 analog, ILX-23-7553, enhances the response to adriamycin and irradiation in MCF-7 breast tumor cells. *Cancer chemotherapy and pharmacology*. 2001; 47:429-436.
  53. Abe-Hashimoto J, Kikuchi T, Matsumoto T, Nishii Y, Ogata E and Ikeda K. Antitumor effect of 22-oxa-calcitriol, a noncalcemic analogue of calcitriol, in athymic mice implanted with human breast carcinoma and its synergism with tamoxifen. *Cancer research*. 1993; 53:2534-2537.
  54. Koshizuka K, Koike M, Asou H, Cho SK, Stephen T, Rude



- RK, Binderup L, Uskokovic M and Koeffler HP. Combined effect of vitamin D3 analogs and paclitaxel on the growth of MCF-7 breast cancer cells *in vivo*. *Breast cancer research and treatment*. 1999; 53:113-120.
55. NIH US. (2014).
  56. Gunes Z, Zucconi A, Cioce M, Meola A, Pezzanera M, Acali S, Zampaglione I, De Pratti V, Bova L, Talamo F, Demartis A, Monaci P, La Monica N, Ciliberto G and Vitelli A. Isolation of Fully Human Antagonistic RON Antibodies Showing Efficient Block of Downstream Signaling and Cell Migration. *Translational oncology*. 2011; 4:38-46.
  57. O'Toole JM, Rabenau KE, Burns K, Lu D, Mangalampalli V, Balderes P, Covino N, Bassi R, Prewett M, Gottfredsen KJ, Thobe MN, Cheng Y, Li Y, Hicklin DJ, Zhu Z, Waltz SE, et al. Therapeutic implications of a human neutralizing antibody to the macrophage-stimulating protein receptor tyrosine kinase (RON), a c-MET family member. *Cancer research*. 2006; 66:9162-9170.
  58. Montero-Julian FA, Dauny I, Flavetta S, Ronsin C, Andre F, Xerri L, Wang MH, Marvaldi J, Breathnach R and Brailly H. Characterization of two monoclonal antibodies against the RON tyrosine kinase receptor. *Hybridoma*. 1998; 17:541-551.
  59. Yao HP, Zhou YQ, Ma Q, Guin S, Padhye SS, Zhang RW and Wang MH. The monoclonal antibody Zt/f2 targeting RON receptor tyrosine kinase as potential therapeutics against tumor growth-mediated by colon cancer cells. *Molecular cancer*. 2011; 10:82.
  60. Li Z, Yao H, Guin S, Padhye SS, Zhou YQ and Wang MH. Monoclonal antibody (mAb)-induced down-regulation of RON receptor tyrosine kinase diminishes tumorigenic activities of colon cancer cells. *International journal of oncology*. 2010; 37:473-482.
  61. Eder JP, Shapiro GI, Appleman LJ, Zhu AX, Miles D, Keer H, Cancilla B, Chu F, Hitchcock-Bryan S, Sherman L, McCallum S, Heath EI, Boerner SA and LoRusso PM. A phase I study of foretinib, a multi-targeted inhibitor of c-Met and vascular endothelial growth factor receptor 2. *Clin Cancer Res*. 2010; 16:3507-3516.
  62. Guin S, Yao HP and Wang MH. RON receptor tyrosine kinase as a target for delivery of chemodrugs by antibody directed pathway for cancer cell cytotoxicity. *Molecular pharmaceutics*. 2010; 7:386-397.
  63. Krishnan AV, Trump DL, Johnson CS and Feldman D. The role of vitamin D in cancer prevention and treatment. *Rheumatic diseases clinics of North America*. 2012; 38:161-178.
  64. Feldman D, Krishnan AV, Swami S, Giovannucci E and Feldman BJ. The role of vitamin D in reducing cancer risk and progression. *Nature reviews*. 2014; 14(5):342-357.
  65. Trump DL, Deeb KK and Johnson CS. Vitamin D: considerations in the continued development as an agent for cancer prevention and therapy. *Cancer journal (Sudbury, Mass.* 2010; 16:1-9.
  66. Li YC, Pirro AE, Amling M, Delling G, Baron R, Bronson R and Demay MB. Targeted ablation of the vitamin D receptor: an animal model of vitamin D-dependent rickets type II with alopecia. *Proceedings of the National Academy of Sciences of the United States of America*. 1997; 94:9831-9835.
  67. Meyer SE, Zinser GM, Stuart WD, Pathrose P and Waltz SE. The Ron receptor tyrosine kinase negatively regulates mammary gland branching morphogenesis. *Developmental biology*. 2009; 333:173-185.
